# Supplementary material for: Chronic inflammation in psoriasis promotes visceral adiposity associated with noncalcified coronary burden over time
Source: JCI journal article supplement (doi:10.1172/jci.insight.142534), 2020-10-26
Supplement: sd1 [file 1]

**Supplemental Table 1. Determinants of visceral adiposity**

| Variable                                              | Visceral Adiposity |              |
|-------------------------------------------------------|--------------------|--------------|
|                                                       | Rho                | P-value      |
| <b>Demographics and clinical characteristics</b>      |                    |              |
| Age, years                                            | 0.31               | <0.001       |
| Males                                                 | 0.42               | <0.001       |
| Hypertension                                          | 0.30               | <0.001       |
| Hyperlipidemia                                        | 0.28               | <0.001       |
| Diabetes mellitus                                     | 0.19               | <0.001       |
| Lipid therapy                                         | 0.38               | <0.001       |
| Current smoker                                        | -0.08              | <0.001       |
| Framingham risk score                                 | 0.55               | <0.001       |
| Body mass index                                       | 0.71               | <0.001       |
| Waist to hip ratio                                    | 0.54               | <0.001       |
| <b>Clinical and lab values</b>                        |                    |              |
| Systolic blood pressure, mm Hg                        | 0.20               | <b>0.001</b> |
| Diastolic blood pressure, mm Hg                       | 0.17               | <b>0.004</b> |
| Total cholesterol, mg/dL                              | -0.05              | 0.43         |
| HDL cholesterol, mg/dL                                | -0.49              | <0.001       |
| LDL cholesterol, mg/dL                                | 0.07               | 0.25         |
| Triglycerides, mg/dL                                  | 0.46               | <0.001       |
| Cholesterol efflux capacity                           | -0.32              | <0.001       |
| hs-CRP, mg/L                                          | 0.31               | <0.001       |
| Fasting blood glucose, mg/dL                          | 0.47               | <0.001       |
| Insulin                                               | 0.67               | <0.001       |
| HOMA-IR                                               | 0.66               | <0.001       |
| Erythrocyte sedimentation rate, mm/hr                 | 0.15               | <b>0.01</b>  |
| GlycA, $\mu\text{mol/L}$                              | 0.37               | <0.001       |
| Subcutaneous adiposity                                | 0.50               | <0.001       |
| <b>Psoriasis characterization</b>                     |                    |              |
| Psoriasis area severity index score                   | 0.17               | <b>0.004</b> |
| Biologic therapy                                      | -0.01              | 0.85         |
| <b>Coronary artery characterization</b>               |                    |              |
| Prevalent plaque                                      | 0.40               | <0.001       |
| Non-calcified coronary artery burden, mm <sup>2</sup> | 0.55               | <0.001       |
| <b>NMR Parameters</b>                                 |                    |              |
| LDL particle number                                   | 0.24               | <0.001       |
| Small LDL particle number                             | 0.46               | <0.001       |
| Large LDL particle number                             | -0.24              | <0.001       |
| VLDL particle number                                  | 0.27               | <0.001       |
| Small VLDL particle number                            | 0.004              | 0.95         |
| Medium VLDL particle number                           | 0.30               | <0.001       |
| Large VLDL particle number                            | 0.51               | <0.001       |

\*HDL indicates high-density lipoprotein; LDL, low-density lipoprotein; hs-CRP, high sensitivity-C reactive protein; HOMA-IR, homeostatic model assessment of insulin resistance; VLDL, very low-density lipoprotein; and PASI, psoriasis area severity index.

**Supplemental Table 2. Patient characteristics at baseline and one year**

| Parameter                                             | Baseline          | One-year          | P-value          |
|-------------------------------------------------------|-------------------|-------------------|------------------|
| <b>Demographics and medical history</b>               | n=176             | n=176             |                  |
| Age, years                                            | 50.6 ± 12.5       | 51.7 ± 12.6       | <b>&lt;0.001</b> |
| Males, n (%)                                          | 111 (63)          | 111 (63)          | 1.00             |
| Hypertension, N (%)                                   | 48 (27)           | 48 (27)           | <b>0.03</b>      |
| Hyperlipidemia, N (%)                                 | 68 (39)           | 73 (41)           | 0.34             |
| Type 2 diabetes mellitus, N (%)                       | 13 (7)            | 14 (8)            | 0.66             |
| Current tobacco use, N (%)                            | 23 (13)           | 14 (8)            | <b>0.01</b>      |
| Lipid treatment, N (%)                                | 51 (30)           | 54 (31)           | 0.41             |
| Framingham risk score                                 | 2.3 (0.7-6.1)     | 2.3 (1.0-6.0)     | 0.92             |
| Body mass index                                       | 28.8 (25.2-32.9)  | 28.4 (24.6-32.3)  | 0.52             |
| <b>Clinical and laboratory values</b>                 |                   |                   |                  |
| Total cholesterol, mg/dL                              | 184.9 ± 38.6      | 182.8 ± 38.3      | 0.20             |
| HDL cholesterol, mg/dL                                | 56.6 ± 19.4       | 57.3 ± 19.7       | 0.21             |
| LDL cholesterol, mg/dL                                | 103.9 ± 30.2      | 100.3 ± 32.6      | 0.05             |
| Triglycerides, mg/dL                                  | 121.6 ± 74.5      | 127.2 ± 73.6      | 0.15             |
| GlycA, µmol/L                                         | 399 (355-444)     | 382 (337-426)     | <b>0.003</b>     |
| hs-CRP, mg/L                                          | 1.8 (0.8-3.8)     | 1.5 (0.7-3.6)     | 0.07             |
| <b>Psoriasis characterization</b>                     |                   |                   |                  |
| Psoriasis area severity index score                   | 5.4 (3.0-10.0)    | 3.2 (1.5-5.5)     | <b>&lt;0.001</b> |
| Biologic therapy, N (%)                               | 60 (34)           | 102 (58)          | <b>&lt;0.001</b> |
| <b>Adipose characterization</b>                       |                   |                   |                  |
| Visceral adiposity (cc <sub>3</sub> )                 | 15883.9 ± 9306.9  | 15817 ± 9253.0    | 0.38             |
| Subcutaneous adiposity (cc <sub>3</sub> )             | 19030.5 ± 10796.4 | 18830.0 ± 10276.8 | 0.21             |
| <b>Coronary Artery Characterization</b>               |                   |                   |                  |
| Total coronary burden, mm <sup>2</sup>                | 1.25 ± 0.55       | 1.24 ± 0.56       | 0.29             |
| Non-calcified coronary artery burden, mm <sup>2</sup> | 1.19 ± 0.53       | 1.17 ± 0.56       | 0.27             |
| Plaque Present (%)                                    | 86 (49)           | 91 (52)           | 0.17             |
| <b>NMR Parameters</b>                                 |                   |                   |                  |
| HDL particle number                                   | 33.8 (30.7-39.5)  | 34.7 (31.0-39.1)  | 0.27             |
| Small HDL particle number                             | 19.8 (14.7-23.6)  | 20.0 (14.5-24.5)  | 0.78             |
| Medium HDL particle number                            | 7.6 (4.6-12.4)    | 8.1 (3.9-13.1)    | 0.34             |
| Large HDL particle number                             | 5.4 (3.0-8.4)     | 5.6 (3.3-8.7)     | 0.06             |
| LDL particle number                                   | 1156 (897-1484)   | 1165 (909-1449)   | 0.73             |
| Small LDL particle number                             | 455 (311-684)     | 479 (278-696)     | 0.68             |
| Large LDL particle number                             | 339 (203-523)     | 403 (216-536)     | 0.36             |
| VLDL particle number                                  | 41.8 (24.1-62.3)  | 45.6 (30.0-63.1)  | 0.19             |
| Small VLDL particle number                            | 20.7 (11.6-33.8)  | 23.8 (14.0-36.9)  | <b>0.02</b>      |
| Medium VLDL particle number                           | 14.6 (6.8-25.6)   | 12.8 (5.4-24.9)   | 0.26             |
| Large VLDL particle number                            | 2.5 (1.2-5.7)     | 3.4 (2.0-6.5)     | <b>&lt;0.001</b> |

\* HDL indicates high-density lipoprotein; LDL, low-density lipoprotein; hs-CRP, high sensitivity-C reactive protein; HOMA-IR, homeostatic model assessment of insulin resistance; VLDL, very low-density lipoprotein; and PASI, psoriasis area severity index.

**Supplemental Table 3. Patient characteristics at baseline and four-years**

| Parameter                                             | Baseline         | Four-year        | P-value          |
|-------------------------------------------------------|------------------|------------------|------------------|
| <b>Demographic and Clinical Characteristics</b>       | n=50             | n=50             |                  |
| Age, years                                            | 51.9 ± 12.0      | 56.2 ± 11.9      | <b>&lt;0.001</b> |
| Males                                                 | 29 (58)          | 29 (58)          | 1.00             |
| Hypertension                                          | 17 (34)          | 12 (24)          | 0.10             |
| Hyperlipidemia                                        | 28 (56)          | 21 (42)          | <b>0.03</b>      |
| Type-2 diabetes                                       | 5 (10)           | 3 (6)            | 0.32             |
| Current smoker                                        | 6 (12)           | 7 (14)           | 0.65             |
| Statin use                                            | 17 (34)          | 20 (40)          | 0.18             |
| <b>Clinical and Lab Values</b>                        |                  |                  |                  |
| Total cholesterol, mg/dL                              | 181.1 ± 43.4     | 181.0 ± 44.2     | 0.99             |
| HDL cholesterol, mg/dL                                | 53.6 ± 20.4      | 54.9 ± 18.5      | 0.42             |
| LDL cholesterol, mg/dL                                | 102.3 ± 32.6     | 97.8 ± 35.2      | 0.38             |
| Triglycerides, mg/dL                                  | 130.8 ± 99.1     | 144.4 ± 92.3     | 0.44             |
| Framingham risk score                                 | 4 (1-7)          | 4 (1-8)          | 0.57             |
| hs-CRP, mg/L                                          | 1.8 (1.0-4.2)    | 2.1 (0.6-4.8)    | 0.78             |
| Body Mass Index (BMI)                                 | 29.0 (26.1-35.7) | 29.6 (25.8-33.0) | 0.48             |
| Glucose, mg/dL                                        | 99.0 ± 16.9      | 106.1 ± 33.8     | 0.04             |
| Insulin, mg/dL                                        | 15.1 ± 8.9       | 15.7 ± 13.5      | 0.71             |
| HOMA-IR                                               | 3.3 (1.7-4.6)    | 2.9 (1.7-5.4)    | 0.87             |
| Visceral Adiposity (cm <sup>3</sup> )                 | 17986 ± 8978     | 18188 ± 8298     | 0.37             |
| Subcutaneous Adiposity (cm <sup>3</sup> )             | 21304 ± 12345    | 20937 ± 11040    | 0.26             |
| Total Adiposity (cm <sup>3</sup> )                    | 39290 ± 18376    | 39125 ± 16012    | 0.44             |
| <b>Psoriasis Severity</b>                             |                  |                  |                  |
| PASI Score                                            | 4.0 (1.8-7.7)    | 1.6 (0.9-3.6)    | <b>0.003</b>     |
| Biologic treatment                                    | 23 (46)          | 29 (58)          | <b>0.004</b>     |
| <b>Coronary Characterization</b>                      |                  |                  |                  |
| Non-calcified coronary artery burden, mm <sup>2</sup> | 1.24 ± 0.56      | 1.25 ± 0.49      | 0.37             |
| Plaque Present (%)                                    | 28 (56)          | 29 (58)          | 0.56             |

\* HDL indicates high-density lipoprotein; LDL, low-density lipoprotein; hs-CRP, high sensitivity-C reactive protein; HOMA-IR, homeostatic model assessment of insulin resistance; VLDL, very low-density lipoprotein; and PASI, psoriasis area severity index.
